# Supplementary material for: Antimalarial Properties of Isoquinoline Derivative from Streptomyces hygroscopicus subsp. Hygroscopicus: An In Silico Approach
Source: Biomed Res Int. 2020 Jan 8;2020:6135696. doi: 10.1155/2020/6135696 (PMC6973190; doi:10.1155/2020/6135696)
Supplement: blast.ncbi.nlm.nih.gov blast.ncbi.nlm.nih.gov Supplementary Materials — Supplementary 1 (S1): BLAST results of protein targets used (determined using blast.ncbi.nlm.nih.gov). Percent of identity was noted by comparing the sequence of protein targets with the most similar protein sequence existed on human (accession no. of protein). The Expect value (E value) used was default in the BLAST system. Supplementary 2 (S2): distance tree results of the protein targets acquired from BLAST analysis (determined using blast.ncbi.nlm.nih.gov). [file 6135696.f1.zip]

Archive with 2 entries (2 files):
- 6135696.f1/S1.Hit Table of Target Proteins.csv
- 6135696.f1/S2.Distance Tree of Results of Target Proteins.pdf
